1 **THE PARALLEL AUDITORY BRAINSTEM RESPONSE**

2

3 Melissa J Polonenko, Ph.D. (ORCID: 0000-0003-1914-6117)

4 Ross K Maddox, Ph.D.\* (ORCID: 0000-0003-2668-0238)

5

6 Department of Biomedical Engineering

7 Department of Neuroscience

8 Del Monte Institute for Neuroscience

9 University of Rochester

10

11 \*correspondence:

12 University of Rochester

13 Goergen Hall

14 Box 270168

15 Rochester, NY 14627

16 Email: [ross.maddox@rochester.edu](mailto:ross.maddox@rochester.edu)

17 **ABSTRACT**

18 The frequency-specific tone-evoked auditory brainstem response (ABR) is an indispensable tool in both the  
19 audiology clinic and research laboratory. Most frequently the toneburst ABR is used to estimate hearing  
20 thresholds in infants, toddlers and other patients for whom behavioral testing is not feasible. Therefore,  
21 results of the ABR exam form the basis for decisions regarding interventions and hearing habilitation with  
22 implications extending far into the child's future. Currently, responses are elicited by periodic sequences of  
23 toneburst stimuli presented serially to one ear at a time, which take a long time to measure multiple  
24 frequencies and intensities, and provide incomplete information if the infant wakes up early. Here we  
25 describe a new method, the parallel ABR (pABR), which uses randomly timed toneburst stimuli to  
26 simultaneously acquire ABR waveforms to 5 frequencies in both ears. Here we describe the pABR and  
27 quantify its effectiveness in addressing the greatest drawback of current methods: test duration. We show  
28 that in adults with normal hearing the pABR yields high-quality waveforms over a range of intensities, with  
29 similar morphology to the standard ABR in a fraction of the recording time. Furthermore, longer latencies  
30 and smaller amplitudes for low frequencies at a high intensity evoked by the pABR versus serial ABR  
31 suggest that responses may have better place specificity due to the masking provided by the other  
32 simultaneous toneburst sequences. Thus, the pABR has substantial potential for facilitating faster  
33 accumulation of more diagnostic information that is important for timely identification and treatment of  
34 hearing loss.

35

36 **KEYWORDS**

37 auditory brainstem response, evoked potentials, objective audiometry, electroencephalography,  
38 assessment

39

## 40 INTRODUCTION

41 The frequency-specific auditory brainstem response (ABR) is an essential diagnostic tool for estimating  
42 audiometric thresholds in infants and other patients for whom behavioral thresholds are difficult or  
43 impossible to obtain. Accurate threshold estimation is critical to determining the need for auditory  
44 prostheses such as hearing aids or cochlear implants, and for enrollment in appropriate habilitation  
45 programs. This process needs to occur quickly because earlier intervention promotes better spoken  
46 speech and language outcomes in children (Ching et al., 2014; Cullington et al., 2017; Harrison, Gordon, &  
47 Mount, 2005; Joint Committee on Infant Hearing, 2007; May-Mederake, 2012; Moeller, 2000; Yoshinaga-  
48 Itano, Sedey, Coulter, & Mehl, 1998). The toneburst ABR has been the gold-standard for infant  
49 assessment because testing can be completed while the infant sleeps and its thresholds highly correlate  
50 (up to 0.9) with behavioral thresholds when a large range of thresholds is considered (Gorga et al., 2006;  
51 Ramos, Almeida, & Lewis, 2013; Stapells & Oates, 1997). While effective at estimating hearing thresholds,  
52 the diagnostic ABR suffers from an important constraint: test time. We aim to describe and validate the  
53 feasibility of our new parallel ABR (pABR) method which is designed to address this time constraint by  
54 presenting multiple frequencies in both ears simultaneously.

55 Reducing test time is important for two main reasons. A diagnostic ABR exam entails measuring a series of  
56 individual responses at several frequencies over a range of intensities in both ears (American Academy of  
57 Audiology, 2012; Hood, 1998, p. 98; Hyde, 2008). Because the exam is highly sensitive to movement  
58 artifacts, the ABR is typically performed while the infant sleeps. This constrains the duration of the test to  
59 that of the infant's nap, which also makes the endpoint unpredictable. To compensate, audiologists must  
60 make decisions about which frequencies and intensities are the most important to acquire in which ears  
61 and pursue those first (e.g., BC Early Hearing Program, 2012, p. 18). If the infant wakes up earlier than  
62 anticipated, the audiologist is forced to choose between inferring thresholds from incomplete data or  
63 scheduling a return visit in which the test can be completed. This delays diagnosis and treatment, poses  
64 risks for attrition, carries additional costs, and adds stress to the family as they await clinical decisions. This  
65 is not a trivial burden of time: approximately 150,000 infants are referred for the exam each year in the  
66 United States alone, with about 10,000 found to be deaf or hard-of-hearing (Task Force on Newborn and  
67 Infant Hearing, 1999; Vohr, 2003). Reducing the exam time and the need for additional visits will free up  
68 clinician time and resources, lowering the barrier for referral and increasing the likelihood that children  
69 receive the needed care in a timely manner. Accurate threshold estimates must be obtained—early  
70 intervention in patients with elevated thresholds leads to improved language, cognitive, and educational  
71 outcomes later in childhood.

72 The second reason test times need to be shortened is to minimize exposure to sedation and anesthesia.  
73 While newborns are able to sleep during the exam, infants over four months old and young children often  
74 cannot sit still or sleep, requiring the use of sedation or general anesthesia (François, Teissier, Barthod, &  
75 Nasra, 2012; Hood, 1998, p. 122). Recent studies investigating the effects of anesthesia on the developing  
76 brain suggest a risk of neurotoxicity. Even a few hours of exposure can result in significant neuronal loss in  
77 young animals, with deleterious effects persisting later in life (Wagner, Ryu, Smith, & Mintz, 2014; Jevtovic-  
78 Todorovic et al., 2003; Creeley et al., 2013; Brambrink et al., 2012). In children, the risk of learning  
79 disabilities increases with longer accumulated exposure to some drugs (Wilder et al., 2009). Based on  
80 these findings, the FDA issued a warning that general anesthesia and sedation drug use should be avoided  
81 or minimized wherever possible for children under three years of age, and should be limited to three  
82 cumulative hours (FDA, 2017). Diagnostic ABRs routinely last between 1 to 3 hours, using up the  
83 recommended exposure times for the first three years of life. Shortening the diagnostic ABR exam would  
84 reduce dosages, and in some situations may make it possible to run the test without drugs. Thus, the  
85 imperative to reduce test time extends beyond cost and convenience: it is essential for reducing the risk of  
86 damaging the developing brain.

87 The signal-to-noise ratio (SNR) of an ABR measurement principally drives how long the measurement  
88 takes because an ABR waveform is the averaged responses to several thousand repetitions of a stimulus.  
89 The SNR of the averaged waveform improves as the number of stimulus repetitions increases. Thus, an  
90 attractive way to attempt shortening test time involves increasing the rate at which stimuli are presented.  
91 Increasing the stimulus rate in practice, however, carries important drawbacks. With typical periodic  
92 stimulus presentation, the time window in which the ABR waveform can be viewed is limited to the inter-  
93 stimulus period, or the inverse of the stimulus rate. Relevant ABR components can have latencies of 12–15  
94 ms, which practically limits the rate to 70–80 Hz. Several studies have sidestepped this constraint by

95 replacing periodic stimulus timing with various types of jitter or randomization schemes, allowing  
96 stimulation rates into the high hundreds of hertz or beyond (Eysholdt & Schreiner, 1982; Özdamar &  
97 Bohórquez, 2006; Valderrama et al., 2012, 2014; Wang, Zhan, Yan, Bohórquez, & Özdamar, 2013). These  
98 high rates reduce noise, but neural adaptation shrinks responses (i.e., signal), which in turn partially or  
99 completely cancels out SNR gains that the faster rates might have provided. Timing randomization shows  
100 some benefit at rates in the low hundreds of stimuli per second, but a lack of translation to the clinic  
101 suggests those are outweighed by the increased complexity of analysis and a lack of normative data.  
102 Additionally, these studies have focused on clicks, rather than more diagnostically relevant toneburst  
103 stimuli.

104 Recording time could also be reduced if responses to different frequency bands could be recorded  
105 simultaneously. This is the approach taken by the multiple auditory steady-state response (ASSR). A single  
106 ASSR stimulus is constructed by modulating a sinusoid carrier at the audiometric test frequency. Rather  
107 than the waveform, the response is a single automatically derived number (e.g., an F-test) that quantifies  
108 the neural phase-locking to the modulator. Giving each test frequency an independent modulation rate  
109 allows separate assessment of responses to several simultaneously presented stimuli. The ASSR can  
110 effectively reduce test time and estimate thresholds that correlate with behavioral thresholds (Luts,  
111 Desloovere, & Wouters, 2006), but it also carries drawbacks. The ASSR does not provide the response  
112 waveforms that audiologists are experts in interpreting. The way the stimuli are constructed also leads to  
113 much higher energy than equivalent toneburst stimuli, which means the clinician must be careful not to  
114 expose the patient to potentially dangerous levels. Despite its availability in a number of clinical devices,  
115 the ASSR has seen narrower adoption than the frequency-specific ABR as a diagnostic exam in the clinic.

116 The goal of this paper is to provide proof of principle for a new paradigm for measuring the ABR to all  
117 frequencies in both ears in parallel. The parallel pABR is accomplished through designing stimuli  
118 comprised of simultaneous, independently randomized sequences of toneburst stimuli. First, we validate  
119 that the paradigm yields high quality canonical brainstem responses at stimulus levels ranging from high to  
120 very low, suggesting the pABR's utility for estimating audiometric thresholds. These responses exhibit  
121 standard ABR morphology, minimizing the need for clinician retraining. We then show that the time to  
122 reach a satisfactory SNR and residual noise value is better for parallel presentation than for the same  
123 randomized toneburst trains presented in serial, especially at lower intensities. Taken together, these  
124 findings demonstrate the pABR's feasibility to meaningfully reduce diagnostic test time with few drawbacks.

125

## 126 **METHODS**

### 127 Human subjects

128 Experiments were completed using a protocol approved by the University of Rochester Research Subjects  
129 Review Board (#66988). All subjects gave informed consent prior to participation and were compensated  
130 for their time. We collected data from 10 subjects (5 females) with a mean  $\pm$  SD age of  $22.6 \pm 4.6$  years  
131 (range: 18.3 to 34.2 years old). Pure-tone audiometric screening confirmed normal hearing thresholds  
132 ( $\leq 20$  dB HL) for each subject at octave frequencies between 500 and 8000 Hz. Subjects self-reported no  
133 other neurological abnormalities.

134

### 135 Stimulus construction

136 Figure 1 depicts stimulus construction for the pABR. As an overview (details given in the next sections),  
137 pABR stimuli are constructed from windowed tonebursts centered at octave frequencies from 500 Hz to  
138 8000 Hz. For each frequency, a toneburst train is created by placing tonebursts randomly within a 1 s  
139 epoch. This is repeated for all other frequencies with independent random processes controlling the timing.  
140 All toneburst trains are summed, and the process repeated with new random processes for the other ear,  
141 comprising a stimulus epoch. Because of the independent timing, we can separately compute the average  
142 ABR waveform to each toneburst train from the same electroencephalography (EEG) data free from  
143 interference. The stimulus presentation rate and intensity can be varied, and we can compare pABR  
144 acquisition to single-frequency serial acquisition by presenting all or only one of the toneburst trains,  
145 respectively, from a stimulus epoch.

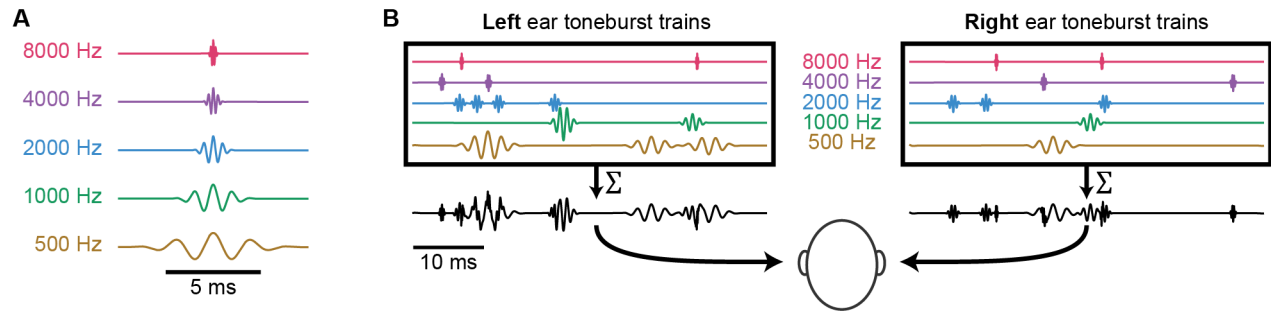

**Figure 1.** pABR stimulus construction. (A) Individual toneburst stimuli for each frequency. (B) Toneburst trains in each ear (colored lines) are summed to create a two-channel (left, right) stimulus epoch (black lines).

146

### 147 Toneburst stimuli

148 Toneburst stimuli were constructed at frequencies of 500, 1000, 2000, 4000, and 8000 Hz. For each  
 149 frequency, five cycles of a cosine were multiplied by a Blackman window of the same length, such that the  
 150 peak of the window was aligned with a maximum of the cosine function (Figure 1A). Consequently,  
 151 individual tonebursts had durations of 10, 5, 2.5, 1.25, and 0.625 ms for each of the five frequencies,  
 152 respectively. Stimuli were generated at a sampling rate of 48 kHz to ensure that the highest stimulus  
 153 frequencies were well below the Nyquist rate. Stimuli were represented in memory as 32-bit integers so  
 154 that the full dynamic range could be tested without risk of quantization distortion.

155 A 1000 Hz sinusoid test tone was used to calibrate the amplitude of the toneburst stimuli. The tone was  
 156 played from the tube of the insert earphones (ER-2, Etymotic Research) into the sound level meter (2240,  
 157 Bruel & Kjaer) using a 2cc acoustic coupler (RA0038, G.R.A.S.) and its digital amplitude was adjusted so  
 158 that its intensity read 80 dB SPL. The amplitude of this sinusoid served as the reference for matching  
 159 amplitudes of the toneburst cosine components to give a toneburst stimulus level of 80 dB peak-equivalent  
 160 SPL (peSPL). Other stimulus levels (L) in dB peSPL were obtained by multiplying the reference-level  
 161 toneburst by  $10^{(L - 80) / 20}$ .

162

### 163 Toneburst trains with randomized stimulus timing

164 Toneburst trains for each frequency were formed by creating an impulse train with random timing at an  
 165 overall rate of 40 stimuli / s, and then convolving the impulse train with the toneburst. To construct an  
 166 impulse train, a vector of zeros was first created with a length of 48,000 samples, corresponding to a 1 s  
 167 interval. Of these, 40 unique sample indices were chosen at random and the zero replaced randomly with  
 168 +1 or -1 so that half of the tonebursts in each train were inverted. The impulse train was then convolved  
 169 with the toneburst, creating a toneburst train with half condensation tonebursts and half rarefaction. Indices  
 170 of the impulse train too close to the end of the 1 s interval were excluded as possibilities if the toneburst  
 171 would be truncated. This way each epoch had 40 stimuli but no tonebursts were cut off by the end of the  
 172 epoch.

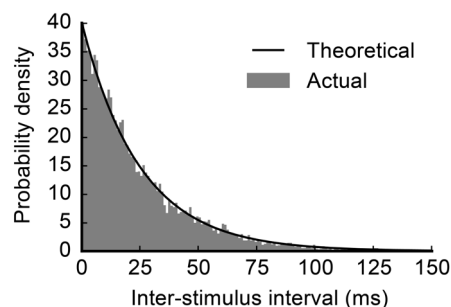

**Figure 2.** The distribution of inter-stimulus intervals over all stimuli for  $\lambda = 40$  stimuli / s (solid gray) compared to the predicted distribution given by  $P(t) = 40e^{-40t}$ . There is a very close match indicating that the deviations from a true Poisson point process used in this experiment are negligible.

173 This process of generating each impulse train timing sequences was essentially a one-dimensional  
 174 homogeneous Poisson point process, with only very subtle differences. Those differences were: 1) the  
 175 number of stimuli was set exactly to 40, rather than setting the process's rate parameter (typically denoted



176 as  $\lambda$ ) to 40; 2) the indices were guaranteed to be unique (though they could have been at adjacent  
177 samples, or 21  $\mu$ s apart); 3) because the epochs were 1 s long, the maximum inter-stimulus interval was  
178 < 1 s. Figure 2 compares the actual inter-stimulus interval histogram of all toneburst trains with the  
179 theoretical exponential distribution of an ideal Poisson process with  $\lambda = 40$  stimuli / s, demonstrating that  
180 they are practically identical.

181

### 182 *Stimulus epochs*

183 Stimulus epochs lasting 1 s were composed of a combination of 10 toneburst trains (5 frequencies  $\times$  2  
184 ears). All toneburst trains for the left ear were summed to create the left channel of the stimulus epoch, and  
185 the same was done for the right ear (Figure 1B). Each toneburst train was created with a different random  
186 seed, such that the timing between any two sequences was completely independent. This statistical  
187 independence is what underlies the ability to present stimuli in parallel while acquiring separate responses  
188 for each ear-frequency combination.

189 Thirty unique stimulus epochs were generated to ensure sufficient statistical independence between the  
190 random processes dictating the toneburst trains (i.e., the impulse trains that were convolved with the  
191 tonebursts) for all frequency-ear combinations. Perfect independence between random sequences is  
192 achieved with infinite durations. However, modeling undertaken before data were collected determined that  
193 30 s sequence durations are enough that any channel interactions are far overpowered by the noise  
194 endemic to EEG recording. We used a frozen set sequences for which statistical independence was  
195 confirmed.

196

### 197 *Stimulus artifact mitigation*

198 During construction of the stimulation sequence, we employed a double counter-phasing scheme. First, as  
199 described above, the polarity of a random half of the tonebursts in each train were inverted, akin to  
200 alternating polarity in periodic stimulation. Second, each of the 30 stimulus epochs were followed in the  
201 stimulation sequence by an inverted version of that epoch. Thus, the order of the first six stimulus epochs  
202 in the sequence was A<sup>+</sup>, A<sup>-</sup>, B<sup>+</sup>, B<sup>-</sup>, C<sup>+</sup>, C<sup>-</sup>, etc., where A, B, and C denote independent stimulus epochs  
203 and the superscript denotes the phase.

204 We also took physical measures to prevent stimulus artifact. We hung earphones from the ceiling so that  
205 they were as far from the EEG cap as possible. We also used active cancellation, wherein each earphone  
206 attached to another in the same orientation, but with a blocked tube. The dummy earphone received an  
207 inverted signal, in order to cancel electromagnetic fields everywhere but close to the transducers. In our  
208 experiments this method outperformed passive shielding in artifact reduction, but we note that we have  
209 made high-quality recordings without using the dummy earphone method. We also point out that this  
210 scheme can be employed in the laboratory, but clinics likely will not (and need not) adopt it.

211

### 212 *Interleaving trial order*

213 To avoid biases introduced by slow changes in recording quality (e.g., due to changes in subject state or  
214 drifting electrode impedances) we interleaved the conditions and consecutively stepped through the trial  
215 order. This prevented issues like transient periods of higher EEG noise or slow impedance drifts from  
216 singularly affecting one condition over the others.

217

### 218 Stimulus presentation and EEG recording

219 Scalp potentials were recorded with passive Ag/AgCl electrodes. A positive (non-inverting) electrode was  
220 placed just anterior to the vertex at FCz in the standard 10-20 coordinates and plugged into a y-connector  
221 which was split into two differential preamplifiers (Brainvision LLC, Greenboro, SC). The two reference  
222 (inverting) electrodes were placed on the left and right earlobes (A1 and A2 respectively). The ground  
223 electrode was placed at Fpz. Data were recorded at a sampling rate of 10 kHz and high-pass filtered at 0.1  
224 Hz during recording, with additional filtering occurring from 30 to 2000 Hz offline using a causal first order  
225 Butterworth filter.

226 Subjects sat in a comfortable recliner in a darkened sound-treated room (IAC, North Aurora, IL, USA). They  
227 were encouraged to relax and to sleep—nearly all subjects slept for at least part of the test, though this  
228 was not rigorously measured. All stimuli were presented through insert earphones (ER-2, Etymotic  
229 Research, Elk Grove, IL) which were connected to a stimulus presentation system consisting of a sound  
230 card (Babyface, RME, Haimhausen, Germany) and a headphone amplifier (HB7, Tucker Davis  
231 Technologies, Alachua, FL, USA). A python script controlled stimulus presentation using publicly available  
232 software (available at <https://github.com/LABSN/expyfun>). Digital triggers were sent from the stimulus  
233 presentation computer to BrainVision's PyCorder software using the sound card's digital audio out  
234 connected to a custom trigger box (modified from a design by the National Acoustic Laboratories, Sydney,  
235 NSW, Australia) to precisely mark the start of each stimulus epoch.

236

### 237 Stimulus conditions used in this study

238 Stimulus level and presentation rate both have important effects on brainstem responses. These factors  
239 and their interactions, as well as optimal ranges, are well studied for traditional ABR. However, the effects  
240 of simultaneous stimulation across all frequencies with random timing are not obvious. For this proof-of-  
241 concept paper we characterized how the responses to pABR stimulation change over an intensity range,  
242 and how these responses compare to those from serial presentation at both a high and low intensity.

243 In one session we measured responses in both ears to pABR stimulation with an average presentation rate  
244 of 40 stimuli / s and intensities in 10 dB steps between 75 and 25 dB peSPL, for frequencies between 500  
245 and 8000 Hz. For a single recording session of 114 minutes, this afforded 16 minutes of recording time per  
246 intensity (96 minutes total) to collect 10 responses (5 frequencies each in 2 ears). Three minutes of clicks  
247 were also recorded at each intensity but were not analyzed here. Consequently, each averaged response  
248 comprised 38,400 repetitions.

249 In a second session we again measured responses to pABR stimulation at a presentation rate of 40  
250 stimuli / s. We also recorded responses at interleaved trials to a serial single-frequency condition that used  
251 the same toneburst trains but tested each frequency separately. We recorded the pABR and serial ABR to  
252 frequencies between 500 and 8000 Hz at both a high and low intensity (75 and 45 dB peSPL). To make  
253 this possible in a single session, only the right ear was tested in the serial condition, under the rough but  
254 necessary assumption that the left ear would show the same behavior. For a single recording session of  
255 108 minutes, this afforded 35 minutes of recording time to collect 20 responses with the pABR (5  
256 frequencies in 2 ears at 2 intensities; 15 minutes at 75 dB peSPL and 20 minutes at 45 dB peSPL for a  
257 total of 36,000 and 48,000 repetitions respectively), and 69 minutes to collect 10 responses serially (5  
258 frequencies in 1 ear at 2 intensities; 26 minutes at 75 dB peSPL and 43 minutes at 45 dB peSPL). More  
259 time was allocated for recording serially collected responses to low frequency tonebursts and the lower  
260 intensity stimuli, such that recording time per serial condition ranged from 4 minutes (9,600 repetitions) for  
261 high intensity and high frequency stimuli (i.e., 2000, 4000, 8000 Hz at 75 dB peSPL) to 15 minutes (36,000  
262 repetitions) for 500 Hz at 45 dB peSPL. Four minutes of clicks were also recorded at each intensity but  
263 were not analyzed here.

264 Of the 10 total subjects, 2 were able to complete only one of the two sessions, resulting in 9 subjects for  
265 each experiment. For the first experiment, one subject's recording was too noisy to see responses and so  
266 was excluded, resulting in a final total of 8 subjects for the first session and 9 subjects for the second  
267 session.

268

### 269 Data analysis

#### 270 *Response calculation*

271 During recording, triggers marked the beginning of each 1 s stimulus block, rather than sending a trigger  
272 for each toneburst stimulus. This was for two reasons: 1) random stimulation at overall high rates (when all  
273 channels are added together) would have resulted in trigger overlaps, and 2) blocks of stimuli can be  
274 analyzed in the frequency domain, which makes calculations substantially faster.

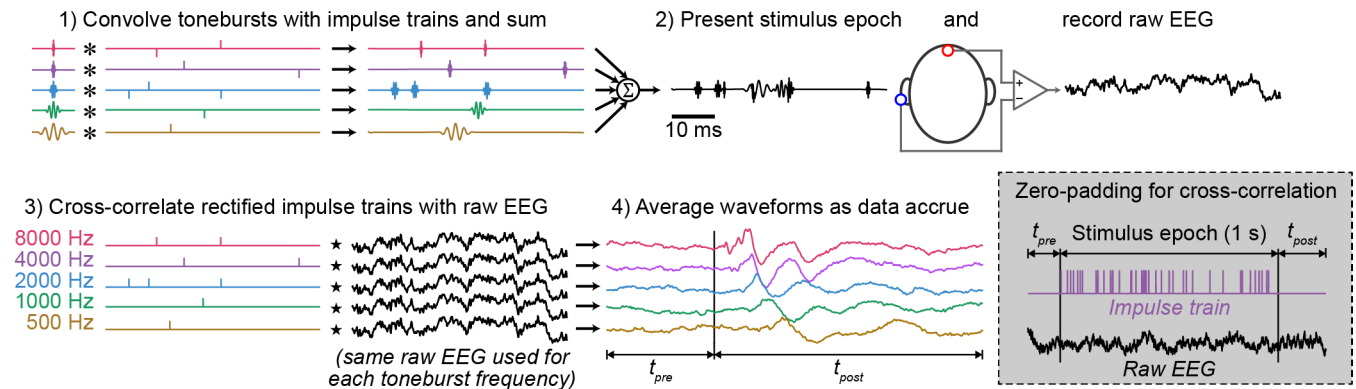

**Figure 3.** The analysis chain, shown from stimulus creation and presentation to calculation of response waveforms. For clarity, only a 50 ms time period is shown. Dashed box: Zero-padding scheme shown for a single impulse train of a single epoch. Note  $t_{pre}$  and  $t_{post}$  are not shown to scale.

275 Raw EEG data were bandpass filtered between 30 and 2000 Hz (causal, first order Butterworth filter). For  
 276 each stimulus epoch we calculated a single average response to the 40 toneburst stimuli. Rather than  
 277 calculate the average response directly, however, we used the mathematically equivalent method of cross-  
 278 correlation, implemented in frequency domain, between the stimulus sequence and the EEG data. Figure 3  
 279 demonstrates this process. Due to the random nature of the stimuli, we were able to extend the analysis  
 280 window for each toneburst to be 1 s long, which is much longer than the tens of milliseconds duration for  
 281 the standard ABR (limited to the reciprocal of the presentation rate). This extended window allowed us to  
 282 calculate response waveforms for the time period 500 ms before and after each stimulus (i.e., from  $-500$  to  
 283  $500$  s, where  $t = 0$  is the time of stimulus/toneburst onset). To do this, for each 1 s stimulus block we took  
 284 the corresponding period of EEG data (1 s) along with the data 500 ms before and after it, leading to 2  
 285 seconds of EEG data, denoted as  $y$ . Then, for each toneburst train, we created a timing sequence by  
 286 placing a single-sample unit-height impulse corresponding to the start of each toneburst (i.e., from the  
 287 rectified impulse train created during stimulus construction), and zero-padded it with 500 ms before and  
 288 after, leading to a 2-second impulse train with all of its impulses located in the middle 1 s, denoted as  $x_{f,e}$ ,  
 289 where  $f$  is the toneburst frequency and  $e$  is the ear stimulated. The response waveform,  $w_{f,e}$ , was  
 290 computed as the circular cross-correlation of  $x_{f,e}$  and  $y$ , done in the frequency domain for efficiency, as

$$291 \quad w_{f,e} = \frac{1}{n_s} \mathcal{F}^{-1} \{ \mathcal{F} \{ x_{f,e} \}^* \mathcal{F} \{ y \} \},$$

292 where  $\mathcal{F}$  denotes the fast Fourier transform,  $\mathcal{F}^{-1}$  its inverse,  $*$  denotes complex conjugation, and  $n_s$  the  
 293 number of impulses in the sequence. This process was repeated for each of the ten toneburst trains (5  
 294 frequencies, 2 ears) for each epoch. This equation assumes  $y$  is a single EEG channel, a common  
 295 scenario for ABR, but this analysis can simply be repeated for each channel if more than one is present. In  
 296 this study we recorded from two channels, but then averaged the calculated responses for further analysis  
 297 because we were not concerned with ipsilateral versus contralateral differences for the purposes of this  
 298 paper. However, separately analyzing ipsilateral and contralateral responses for clinical applications would  
 299 be easy to perform by keeping the two channels separate rather than averaging. It should also be noted  
 300 that the typical per-stimulus epoching and averaging in the time domain could have been employed and  
 301 yields identical results but at greater computational cost.

302

### 303 Response averaging

304 Because the quality of the ABR waveforms as a function of acquisition time was of interest, we calculated  
 305 the cumulative averaged response after each 1 s stimulus block. To account for variations in noise levels  
 306 over time (either slow drifts or due to transient sources like movement artifacts), we weighed each  
 307 response according to the inverse of the noise in that epoch. This process is the same in principle as  
 308 Bayesian averaging described by Elberling and Wahlgreen (1985), but the noise variance was calculated  
 309 differently. We computed the variance of the pre-stimulus window in the time period  $-480$  ms to  $-20$  ms.  
 310 We then weighed each epoch by the inverse of its variance relative to the sum of the inverse of variances  
 311 of all epochs



312

$$g_i = \frac{1 / \sigma_i^2}{\sum_{i=1}^n 1 / \sigma_i^2},$$

313 where  $i$  is the epoch number and  $n$  is the number of collected epochs. The averaged response was then  
314 calculated as

315

$$w = \sum_{i=1}^n g_i w_i.$$

316 This averaging process avoids the need for artifact rejection based on thresholds, and also takes  
317 advantage of the long pre-stimulus window afforded by randomized timing sequences to give a better  
318 estimate of the noise.

319

### 320 *SNR calculation*

321 The SNR of a waveform was estimated by comparing the variance (i.e., mean-subtracted energy) of the  
322 waveform in the 10 ms latency range starting at a lag that captured wave V for that frequency (500 Hz:  
323 10.5 ms, 1000 Hz: 7.5 ms, 2000 Hz: 6.5 ms, 4000 and 8000 Hz: 5 ms; Stapells, 2011). That period  
324 contained signal and noise, so its variance is denoted  $\sigma_{S+N}^2$ . We estimated the noise variance,  $\sigma_N^2$ , by  
325 segmenting the pre-stimulus baseline between -480 and -20 ms into 10 ms intervals, finding the variance  
326 of each one, and computing the mean. We then computed the SNR in decibels for every waveform as

$$327 \quad SNR = 10 \log_{10} \left[ \frac{\sigma_{S+N}^2 - \sigma_N^2}{\sigma_N^2} \right].$$

328

## 329 **RESULTS**

### 330 The pABR yields canonical waveforms that characteristically change over a range of intensities

331 We recorded the pABR over a range of stimulus levels from 75 to 25 dB peSPL in 10 dB steps. Figure 4  
332 shows the grand average and responses from two example subjects. Overall response morphology  
333 strongly resembled those yielded by traditional methods.

334 Aspects of response morphology were quantified by a trained audiologist (MJP) who manually inspected  
335 each waveform to determine the presence, amplitude and latency of wave V. The same measures were  
336 quantified by the other author (RKM) in 38% of responses. The intraclass correlation coefficient (ICC3) for  
337 each frequency and measure was  $\geq 0.9$  (all  $p < 0.001$ ), indicating excellent reliability for chosen wave V  
338 peak latencies and amplitudes. We modeled wave V latency (Figure 5A) and amplitude (Figure 5B) using  
339 two linear mixed effects models, each with a random intercept for each subject and fixed factors of ear,  
340 stimulus level, stimulus frequency in log units, and the interaction for log frequency and stimulus level.  
341 Wave V latency showed no difference between ears ( $p = 0.66$ ) but there were significant effects of level,  
342 frequency, and a significant level-frequency interaction (all  $p < .001$ ), indicating that latency decreased with  
343 increasing level and increasing frequency, and the effect of intensity was greater at lower frequencies.  
344 Wave V amplitude increased with stimulus level ( $p < .001$ ) and this increase was greater for higher  
345 frequencies (significant level-frequency interaction,  $p < .001$ ). These trends are clearly visible in Figure 5,  
346 and are generally consistent with traditional ABR (Burkard, Don, & Eggermont, 2006).

347

348 While we did not quantify the presence of waves other than wave V, Figure 4 also shows that both waves I  
349 and III are clearly visible at higher frequencies in the grand average as well as typical individual responses.  
350 Measuring wave I rapidly and at the moderate intensities used in this study may have applications to the  
351 study of hidden hearing loss (Lieberman, Epstein, Cleveland, Wang, & Maison, 2016).

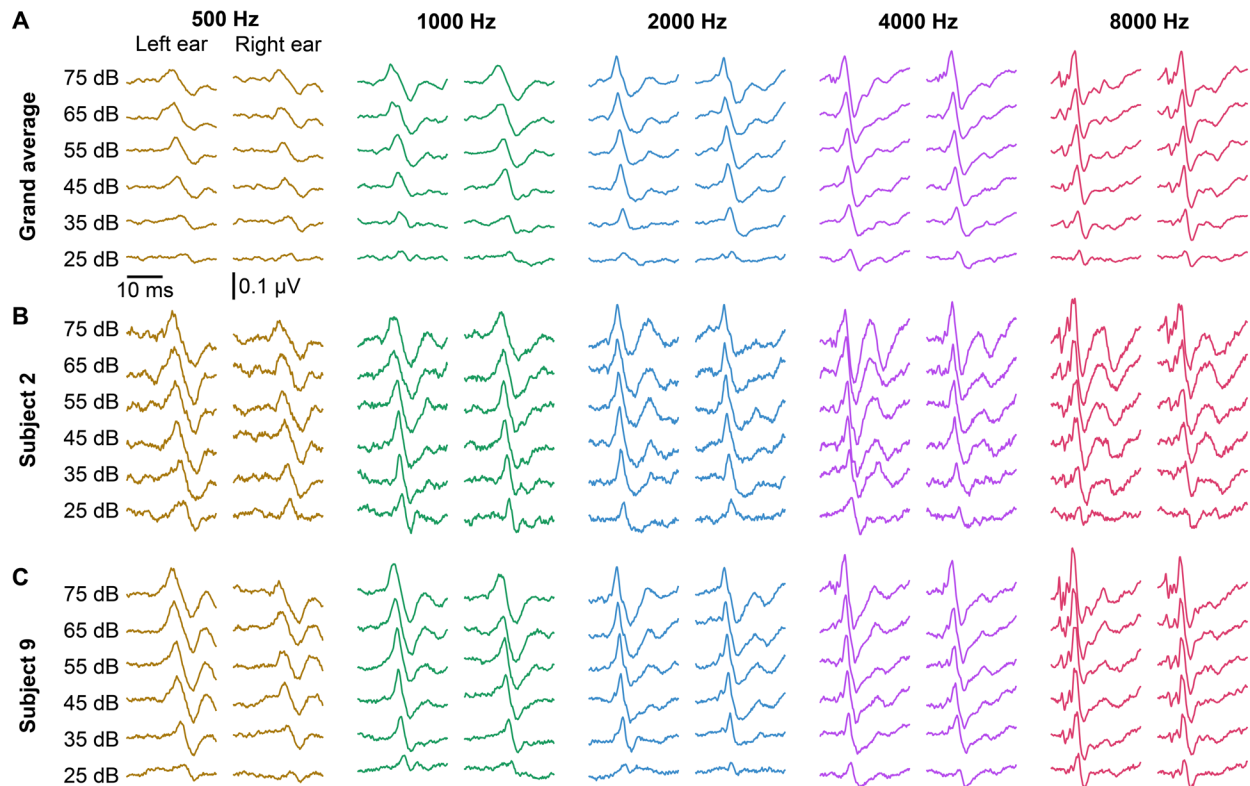

**Figure 4.** Intensity series waveforms across frequencies and for the left and right ears. (A) Grand average of 8 subjects. (B,C) Two example subjects' responses. All responses are plotted over the interval 0 to 25 ms.

352 We thus found that the pABR gives typical ABR waveforms over a range of frequencies and intensities and  
 353 recapitulates the effects of stimulus frequency and intensity on response morphology seen in traditional  
 354 ABR. In the next section we directly compare pABR with serially recorded responses recorded in the same  
 355 subject in a single session.

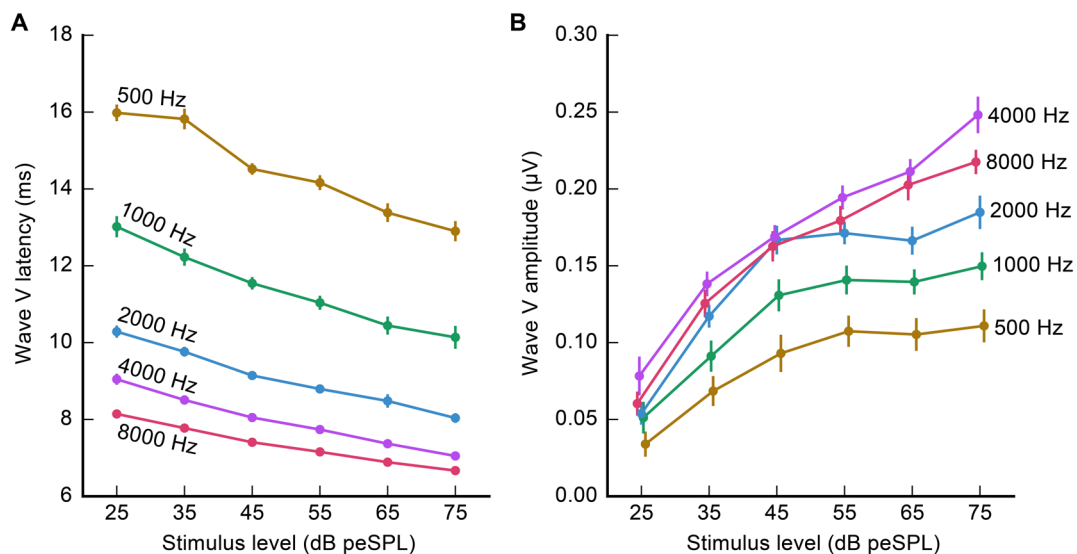

**Figure 5.** Mean wave V latency (A) and amplitude (B) as a function of intensity. Stimulus frequency is indicated on each line. Error bars (where large enough to be seen) indicate  $\pm 1$  SEM. Lines have a slight horizontal offset in B to reduce overlap.

356

357 pABR and serial response waveforms differ in latency and amplitude at high intensities

358 We recorded responses in 9 subjects (8 of whom also participated in the previous experiment) to stimulus  
359 trains presented in parallel (all frequencies, both ears), versus the same stimulus trains presented serially  
360 (one frequency, one ear). Due to time constraints, serial responses could only be recorded in one ear  
361 (right), and so even though the pABR recorded responses in both ears, only the right ear responses were  
362 compared. Responses were measured for a high and low intensity (75 and 45 dB peSPL respectively).

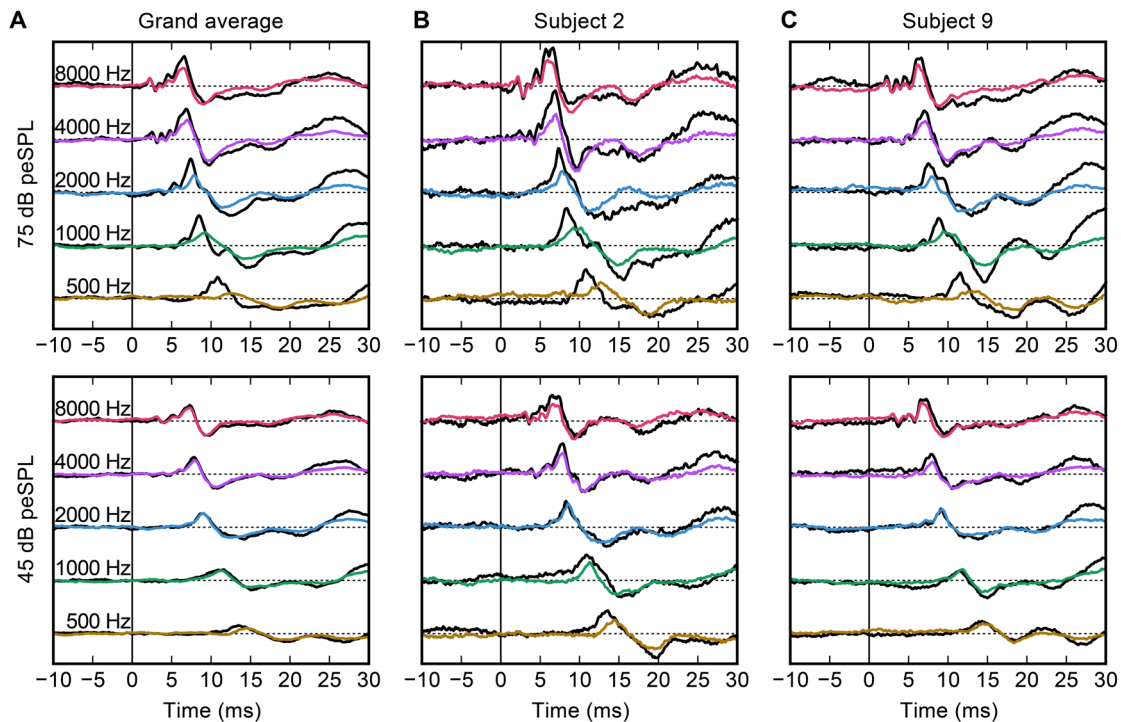

**Figure 6.** Parallel vs series acquisition waveforms (right ear only). (A) Grand average. (B,C) Example subjects. pABR is shown in colored lines. Corresponding serial waveforms are shown in black. Vertical spacing is  $0.3 \mu\text{V} / \text{div}$ .

363 Figure 6 shows grand averaged responses and responses from two subjects for pABR (colored as in other  
364 figures) and the corresponding serial responses (black). Each overlapping waveform is a response to the  
365 same stimuli that only differ in the presentation context (parallel, with other stimuli simultaneously present,  
366 versus serial, with stimulus trains presented in isolation). Overall waveform morphology of responses were  
367 similar using both methods, with some differences in wave V amplitude and latency, described in detail  
368 below.

369 Wave V peak latency and amplitude were further quantified and are displayed for pABR versus serial ABR  
370 acquisition in Figure 7. Again, we showed good agreement in our wave V choices (all ICC3  $\geq 0.89$ ,  $p <$   
371  $0.001$ ). Linear mixed effects models of wave V latency and amplitude were used again with a random  
372 intercept for subject and fixed factors of method (pABR versus serial), stimulus level (75 and 45 dB  
373 peSPL), log frequency, as well as the full set of two and three-factor interactions. Latency (Figure 7A)  
374 showed significant effects of stimulus level ( $p = .012$ ) and frequency ( $p < .001$ ) as well as the method-level-  
375 frequency interaction ( $p = .004$ ). Thus, as expected, latencies were longer at lower frequencies and levels.  
376 In addition, latencies were longer for pABR than serial ABR for lower frequencies at higher levels. This  
377 interaction trend is also clearly visible in the 500 Hz 75 dB peSPL waveforms of Figure 6 for the grand  
378 averages and both example subjects. For amplitude (Figure 7B), only the two-way interaction of method  
379 and level was significant ( $p = 0.032$ ), indicating that serial ABR shows larger wave V amplitudes at the  
380 higher stimulus level. The significant interaction terms of the latency and amplitude models are both  
381 consistent with potentially improved place specificity afforded by pABR, a notion which receives a fuller  
382 explanation in the Discussion section.

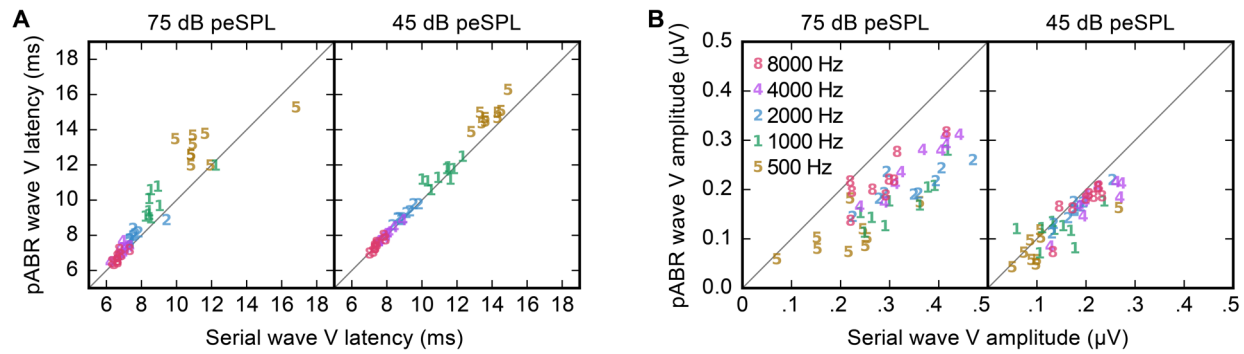

**Figure 7.** Comparison of pABR with serial wave V latency (A) and amplitude (B) for all subjects ( $N = 9$ ) at each frequency for both stimulus levels. Quantities shown are for the right ear. Stimulus frequency indicated by marker number and color.

383

### 384 Acquisition times are faster for pABR than serial measurement

385 Having compared waveform morphology and demonstrated that pABR provides canonical waveforms with  
 386 only minor systematic differences in wave V amplitude and latency, we next compared the acquisition time of  
 387 pABR to serial measurements.

388 First we characterized the time (in minutes) it took to reach a residual noise of 20 nV, which was calculated  
 389 for each waveform as the square root of  $\sigma_N^2$ . For pABR recording, the time for the responses across all  
 390 frequencies to reach criterion was defined as the time taken by the slowest response to reach 20 nV (i.e.,  
 391 the maximum time across all responses). For serial measurement, the acquisition time was the sum of the  
 392 times for each of the five frequencies' responses to reach criterion, doubled to account for the other ear.  
 393 We calculated the time to the 20 nV residual noise criterion for all subjects at both stimulus levels, leading  
 394 to 18 estimates for each acquisition method, which are plotted as a histogram in Figure 8. The pABR  
 395 reached 20 nV for all waveforms with a median time of 4.6 minutes (3.8–5.4 minutes interquartile range).  
 396 Serial recordings, on the other hand, took substantially longer at 30.1 minutes (23.8–40.0 minutes).  
 397 Dividing each serial time by each corresponding pABR time yielded a median speedup ratio of 6.0 (5.7–6.6  
 398 interquartile range), indicating a large advantage for the pABR.

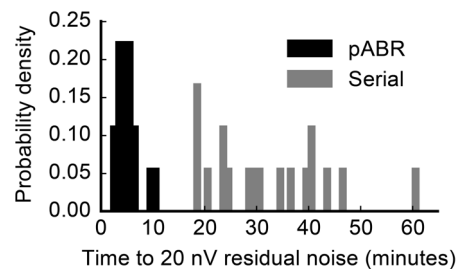

**Figure 8.** Comparison of time to reach 20 nV residual noise for all 10 waveforms between methods (pABR in black, serial in gray). Two intensities for 9 subjects are shown, leading to 18 data points for each acquisition method.

399 The residual noise numbers indicate that in situations where multiple waveforms are desired, recording  
 400 them in parallel leads to lower noise levels much faster than recording them one at a time. If pABR yielded  
 401 identical responses to serial measurement, then the speedup ratios for response acquisition would be  
 402 higher. However, because the pABR leads to smaller responses in some situations (low frequencies at  
 403 high intensities), the speedups were less pronounced, particularly at higher intensities.

404 Second, we further compared estimated acquisition times by calculating the time required for all waveforms  
 405 of a given intensity to reach 0 dB SNR<sup>1</sup>. As with the residual noise estimates, the total acquisition time for  
 406 pABR was the time it took for the last waveform to reach threshold, and the total time for serial acquisition  
 407 was the sum of acquisition times for all waveforms (here approximated as the total for one ear, doubled).

<sup>1</sup>The choice of 0 dB as the SNR threshold was arbitrary and based on visual assessment of when waveforms looked “good.” Changing this threshold would have changed the acquisition times. This change, however, would be multiplicative, such that the speedup ratios—our measure of how much faster the pABR is—would be unaffected.

408 These times are given for all subjects in Table 1, and Figure 9A shows an example acquisition run modeled  
 409 from one subject's data for demonstration purposes. At 75 dB peSPL, the median acquisition time for  
 410 pABR was 1.93 minutes (0.93–3.63 minutes interquartile range) and for serial acquisition was 1.45 minutes  
 411 (0.94–3.45 minutes interquartile range). Parallel acquisition was faster for 5 of 9 subjects, with a median  
 412 pABR speedup ratio of 1.45 (0.89–1.64). At 45 dB peSPL the acquisition time difference was pronounced:  
 413 median acquisition time for pABR was 4.60 minutes (1.86–8.99 minutes) versus 7.81 minutes (5.95–9.92  
 414 minutes) for serial presentation. At this lower intensity, pABR was faster than serial recording for all 9  
 415 subjects, with a median pABR speedup ratio of 2.99 (1.12–3.92 interquartile range). A scatterplot  
 416 comparing the pABR and serial acquisition times at 75 and 45 dB peSPL (filled and open circles,  
 417 respectively) is shown in Figure 9B. Points below the unity line indicate a pABR advantage.  
 418

|                            |          | S2          | S3   | S5   | S6   | S7    | S8    | S9   | S10  | S11   | LQ          | MED         | UQ          |             |
|----------------------------|----------|-------------|------|------|------|-------|-------|------|------|-------|-------------|-------------|-------------|-------------|
| 75 dB peSPL                | Parallel | 500 Hz      | 0.41 | 4.91 | 1.93 | 3.00  | 22.56 | 0.99 | 0.93 | 0.50  | 3.63        | 0.93        | 1.93        | 3.63        |
|                            |          | 1000 Hz     | 0.35 | 0.68 | 0.97 | 0.60  | 2.39  | 0.36 | 0.24 | 0.21  | 1.40        | 0.35        | 0.60        | 0.97        |
|                            |          | 2000 Hz     | 0.36 | 0.54 | 0.70 | 0.91  | 1.89  | 0.19 | 0.29 | 0.40  | 0.51        | 0.36        | 0.51        | 0.70        |
|                            |          | 4000 Hz     | 0.17 | 0.64 | 0.26 | 0.32  | 1.82  | 0.16 | 0.27 | 0.30  | 0.31        | 0.26        | 0.30        | 0.32        |
|                            |          | 8000 Hz     | 0.20 | 0.66 | 0.44 | 0.64  | 2.88  | 0.27 | 0.28 | 0.25  | 0.66        | 0.27        | 0.44        | 0.66        |
|                            |          | Total (MAX) | 0.41 | 4.91 | 1.93 | 3.00  | 22.56 | 0.99 | 0.93 | 0.50  | 3.63        | <b>0.93</b> | <b>1.93</b> | <b>3.63</b> |
|                            | Serial   | 500 Hz      | 0.18 | 0.73 | 0.61 | 0.27  | 14.24 | 0.35 | 0.15 | 0.09  | 0.79        | 0.18        | 0.35        | 0.73        |
|                            |          | 1000 Hz     | 0.06 | 0.19 | 0.27 | 0.06  | 0.77  | 0.12 | 0.05 | 0.07  | 0.22        | 0.06        | 0.12        | 0.22        |
|                            |          | 2000 Hz     | 0.07 | 0.19 | 0.16 | 0.13  | 0.79  | 0.08 | 0.07 | 0.05  | 0.14        | 0.07        | 0.13        | 0.16        |
|                            |          | 4000 Hz     | 0.05 | 0.32 | 0.15 | 0.10  | 0.74  | 0.08 | 0.06 | 0.08  | 0.21        | 0.08        | 0.10        | 0.21        |
| 8000 Hz                    |          | 0.11        | 0.41 | 0.43 | 0.16 | 0.66  | 0.09  | 0.08 | 0.11 | 0.36  | 0.11        | 0.16        | 0.41        |             |
| Total (2×SUM)              |          | 0.94        | 3.68 | 3.23 | 1.45 | 34.40 | 1.44  | 0.82 | 0.82 | 3.45  | <b>0.94</b> | <b>1.45</b> | <b>3.45</b> |             |
| 45 dB peSPL                | Parallel | 500 Hz      | 0.57 | 8.99 | 1.44 | 7.76  | 8.78  | 1.86 | 0.83 | 4.60  | 53.12       | 1.44        | 4.60        | 8.78        |
|                            |          | 1000 Hz     | 0.47 | 1.76 | 3.04 | 1.31  | 7.79  | 0.86 | 0.58 | 0.82  | 1.73        | 0.82        | 1.31        | 1.76        |
|                            |          | 2000 Hz     | 0.23 | 0.62 | 1.10 | 1.03  | 3.69  | 0.31 | 0.29 | 0.50  | 1.01        | 0.31        | 0.62        | 1.03        |
|                            |          | 4000 Hz     | 0.41 | 0.93 | 0.47 | 0.71  | 9.26  | 0.25 | 0.32 | 0.50  | 0.69        | 0.41        | 0.50        | 0.71        |
|                            |          | 8000 Hz     | 0.57 | 1.54 | 0.65 | 0.84  | 10.34 | 0.30 | 0.30 | 0.45  | 1.10        | 0.45        | 0.65        | 1.10        |
|                            |          | Total (MAX) | 0.57 | 8.99 | 3.04 | 7.76  | 10.34 | 1.86 | 0.83 | 4.60  | 53.12       | <b>1.86</b> | <b>4.60</b> | <b>8.99</b> |
|                            | Serial   | 500 Hz      | 0.15 | 1.71 | 1.99 | 1.56  | 11.64 | 2.11 | 0.84 | 0.89  | 20.17       | 0.89        | 1.71        | 2.11        |
|                            |          | 1000 Hz     | 0.13 | 0.60 | 0.37 | 0.83  | 6.00  | 0.98 | 0.48 | 0.91  | 7.12        | 0.48        | 0.83        | 0.98        |
|                            |          | 2000 Hz     | 0.15 | 0.51 | 1.00 | 0.67  | 5.52  | 0.18 | 0.32 | 0.42  | 0.77        | 0.32        | 0.51        | 0.77        |
|                            |          | 4000 Hz     | 0.22 | 0.85 | 0.53 | 0.37  | 4.50  | 0.16 | 0.21 | 0.45  | 0.53        | 0.22        | 0.45        | 0.53        |
| 8000 Hz                    |          | 0.21        | 1.29 | 0.66 | 0.47 | 2.81  | 0.20  | 0.23 | 0.31 | 1.21  | 0.23        | 0.47        | 1.21        |             |
| Total (2×SUM)              |          | 1.72        | 9.92 | 9.10 | 7.81 | 60.94 | 7.27  | 4.16 | 5.95 | 59.60 | <b>5.95</b> | <b>7.81</b> | <b>9.92</b> |             |
|                            |          | S2          | S3   | S0   | S6   | S7    | S8    | S9   | S10  | S11   | LQ          | MED         | UQ          |             |
| <i>Speedup 75 dB peSPL</i> |          | 2.30        | 0.75 | 1.68 | 0.48 | 1.52  | 1.45  | 0.89 | 1.64 | 0.95  | <b>0.89</b> | <b>1.45</b> | <b>1.64</b> |             |
| <i>Speedup 45 dB peSPL</i> |          | 3.00        | 1.10 | 2.99 | 1.01 | 5.90  | 3.92  | 5.03 | 1.29 | 1.12  | <b>1.12</b> | <b>2.99</b> | <b>3.92</b> |             |

419

420 **Table 1.** Time to 0 dB SNR (in minutes) for each subject as well as the median and quantiles. For each method at each stimulus  
 421 level the time is shown for all frequencies, with the total (computed with the appropriate method) shown below. Shown at the  
 422 bottom in italics are the speedups for both stimulus levels. These numbers are unitless ratios, rather than minutes, where higher  
 423 numbers represent an advantage for the pABR over the serial ABR.



424 Even in the case where a pABR and corresponding serial acquisition take the same amount of time, there  
 425 is a secondary SNR advantage for pABR which comes from the criterion that ends each run. For the pABR,  
 426 data continues to accrue for all waveforms while waiting for the last response to reach criterion. Therefore,  
 427 at the end of the run all but the slowest waveform will have an SNR better than the stopping criterion. In  
 428 contrast, for serial acquisition, at the end of the run all waveforms will have just reached criterion SNR. This  
 429 difference can be seen in Figure 9A, where at the end of the parallel run (double black line at time 1:55) all  
 430 but the 500 Hz right ear response are better than 0 dB SNR. This pABR SNR benefit can be quantified by  
 431 examining the SNR of the pABR waveforms at the time point when the corresponding serial run completed  
 432 (red dashed line at time 8:34). These SNR benefits are plotted in Figure 9C for all frequencies at both  
 433 intensities. At 75 dB peSPL, the median SNR benefits for 500 through 8000 Hz are 1.6, 5.4, 6.6, 7.6, 7.2  
 434 dB. For lower intensity of 45 dB peSPL, the benefits are even greater: 4.8, 8.6, 11.6, 10.7, 11.2 dB from  
 435 500 to 8000 Hz. These improvements potentially allow much better assessment of waveform morphology,  
 436 such as the presence and size of wave I.

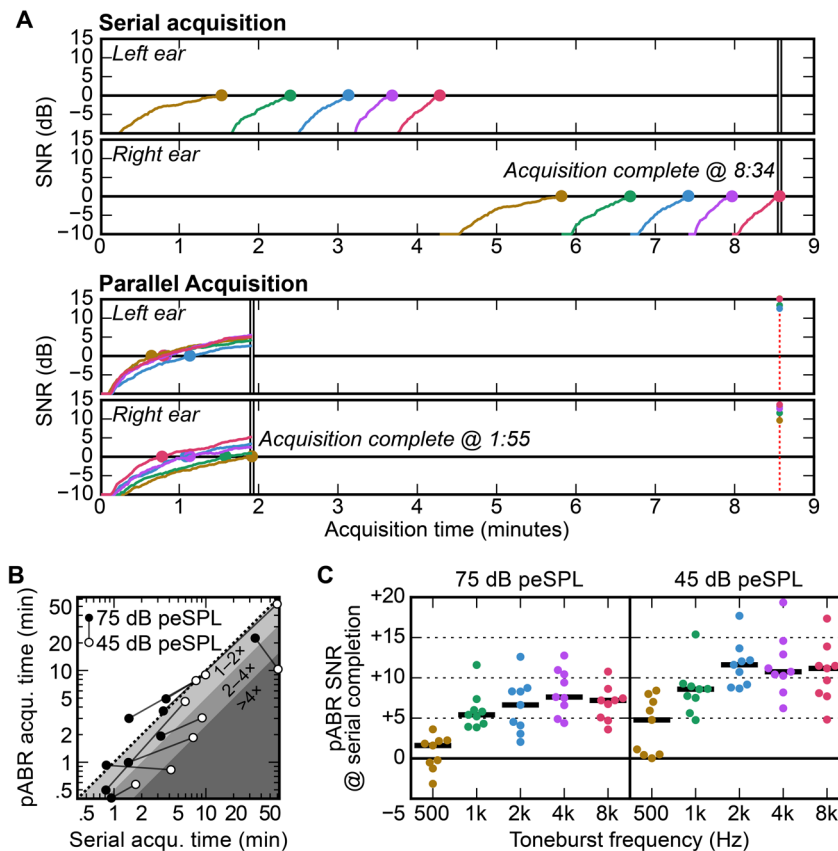

**Figure 9.** pABR shows faster acquisition and better SNR. (A) Real-time acquisition runs simulated from offline data for one subject at 45 dB peSPL. For serial ABR, unrecorded left ear runs were assumed to be equal to right ear. (B) Comparison recording time for 9 subjects. Points below dotted unity line are cases where pABR is faster. Shaded regions indicate speedup ratios of 1–2 (light gray), 2–4 (medium gray), and > 4 (dark gray). (C) SNR of pABR runs upon serial acquisition completion (subjects colored points, median black lines), corresponding for one subject to the points on the red dashed vertical line in A.

437

## 438 DISCUSSION

439 Here we describe the pABR, a new method for recording the frequency-specific ABR to multiple  
 440 simultaneous stimulus trains at several octave frequencies in both ears. The pABR yields waveforms with  
 441 canonical response components, namely wave V, albeit at slightly different latencies and amplitudes at  
 442 higher intensities. The principal advantage of the pABR is that low noise levels are achieved in drastically  
 443 shorter times, which leads to faster acquisition times. Faster response acquisition will yield shorter clinic  
 444 visits, or visits of the same length that yield much better estimates of the hearing thresholds on which  
 445 crucial clinical decisions are based. Furthermore, octave frequencies from 500 to 8000 Hz can be obtained  
 446 in comparable or shorter lengths of time, which provides a more comprehensive assessment of hearing  
 447 function than typically achieved in current clinical practice. At best, 500–4000 Hz thresholds are currently

448 achieved but more often only 500, 2000 and maybe 4000 Hz are obtained (American Academy of  
449 Audiology, 2012; BC Early Hearing Program, 2012; Hyde, 2008). The most obvious question about the  
450 pABR—how *much* faster is it—is also the most difficult to answer because it depends on a multitude of  
451 factors. We discuss several of these factors below.

452 The estimate of acquisition time we used here—time to criterion SNR—was objective but most useful for  
453 relative comparisons between the methods rather than absolute estimates of acquisition time. First, the  
454 choice of SNR has a large effect on the time in minutes (using +3 dB instead of 0 dB would have doubled  
455 all the times, for instance), so the times reported here should be considered within the context of our  
456 chosen criterion. However, a change in criterion would not affect the speedup ratios. These ratios indicate  
457 that the pABR can yield 10 good waveforms about 3 times faster than the serial ABR in at least half the  
458 cases (Table 1). This means more information could be collected in an appointment, or the same amount  
459 of information could be collected quicker. For some subjects, acquisition of 10 waveforms occurred quickly,  
460 with times as low as less than half a minute (Table 1). For the pABR at a level closer to threshold (i.e., 45  
461 dB peSPL), 5 of 9 subjects achieved good waveforms within 5 minutes, compared to only 2 subjects with  
462 serial presentation. As would happen in the clinic, there were some subjects that had noisier responses  
463 and took substantially longer to acquire 10 waveforms with both parallel and serial presentation, such as  
464 two subjects who achieved waveforms in estimated times of about 53 (pABR) and 61 (serial) minutes. The  
465 pABR is subject to the effects of noisy testing situations, just as the serial ABR. However, these time  
466 estimates may also be conservative given the automatic calculation of SNR. Importantly, audiologists are  
467 highly trained at recognizing response components. For example, in many cases while analyzing our data  
468 we could see a clear 500 Hz response when the SNR was still below our 0 dB SNR criterion. For those  
469 subjects who had estimated times to 0 dB SNR greater than 10 minutes, a trained audiologist would likely  
470 detect the presence or absence of a waveform earlier and make decisions about moving on to another  
471 level. Testing with trained clinicians interpreting waveforms as they are acquired in real time will give more  
472 meaningful time estimates in minutes.

473 The pABR offers advantages that will make clinicians' decisions about response presence more accurate  
474 and easier to make. First, viewing the response to a specific frequency in context of the other frequencies  
475 being simultaneously acquired allows the clinician to make a better, holistic assessment of its  
476 presence/absence than viewing the same waveform in isolation. Second, extending the analysis window  
477 (made possible by the random stimulus timing) can show later response components, such as the middle  
478 latency response (MLR), which when present can further eliminate uncertainty whether a response is  
479 present or absent. Our focus was on the ABR, but extending the signal beyond 10 ms to include the MLR  
480 will improve SNR estimates and may also further decrease acquisition times based on time to 0 dB SNR.  
481 Including the MLR may have shortened the long acquisition times estimated for the particularly noisy  
482 subjects discussed above (see Table 1). The pre-stimulus period can also be extended, giving a better  
483 impression of the noise. These advantages are highlighted in Figure 10. In panel A, the 500 Hz response is  
484 shown on its own. A response may be present, but its amplitude is only slightly greater than that of the  
485 noise. In panel B, the same response is shown along with the other simultaneously recorded frequencies  
486 for that ear, making the 500 Hz response easier to see. In panel C, the extended analysis window provides  
487 a clearer pre-stimulus baseline and middle latency components at ~35 ms that make the presence of a 500  
488 Hz response more certain. The use of latencies beyond the typical ABR window will be an important  
489 subject of future investigation.

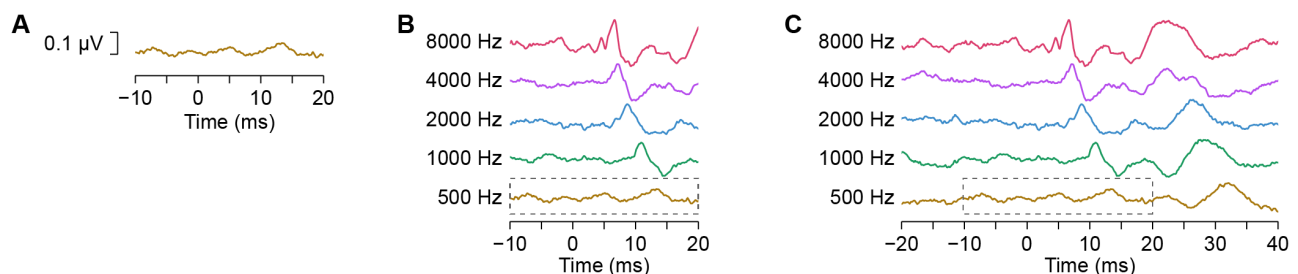

**Figure 10.** Improved visual response detection. (A) 500 Hz response waveform alone. (B) Same response with other frequencies simultaneously acquired. Dotted gray box surrounds the waveform from A. (C) 500 Hz response with other frequencies present and analysis window extended 10 ms to the left and 20 ms to the right. Gray box as in B.

490 The hearing thresholds of the people being tested will also have a large effect on the overall measurement  
491 time. In the present study all subjects had normal hearing thresholds, and 500 Hz was the most difficult

492 response to acquire. This is not surprising, and even during current diagnostic exams normal hearing for  
493 500 Hz is determined using a higher level than the other frequencies (American Academy of Audiology,  
494 2012; BC Early Hearing Program, 2012; Hyde, 2008). However, high frequency sloping loss is the most  
495 common configuration (e.g., Pittman & Stelmachowicz, 2003). Thus, while the pABR's speed advantage  
496 was limited by the low frequency acquisition time here, this may not be true in most cases where a hearing  
497 loss is present. At higher levels necessary to determine high frequency thresholds, the level for 500 Hz  
498 would be suprathreshold and generate responses with larger SNRs quicker than at a level near threshold  
499 (e.g., time to 0 dB SNR for 75 versus 45 dB peSPL in Table 1, Figure 9B). Consequently, the actual  
500 acquisition time could be further reduced relative to traditional methods. Additionally, because the pABR  
501 reaches low residual noise levels faster than traditional methods, the pABR may allow clinicians to more  
502 quickly determine “no response” when none is present.

503 There are thus several factors that limit our ability to fully predict the absolute speed gains the pABR will  
504 provide in the clinic. Even non-measurement times between runs will be reduced because the clinician  
505 need only select the next intensity to test, rather than choosing a specific intensity-frequency-ear  
506 combination as the next step of the threshold search. We show here that the pABR is faster than traditional  
507 methods and offers a number of factors that may further improve the speedup. The next step to quantifying  
508 the full advantages for clinical use will involve testing the pABR in an actual clinical setting with the patients  
509 of interest—namely people (adults, infants, and children) with a wide range of hearing loss.

510 The pABR is not the only objective audiometric tool that allows simultaneous threshold estimation at  
511 multiple frequencies—this is also accomplished by the multiple ASSR. As such, the ASSR warrants  
512 comparison with the pABR. The ASSR is an evoked response that is phase-locked to a periodic stimulus  
513 and can also be measured with most ABR hardware. In clinical settings, the stimulus is typically a tonal  
514 carrier at the test frequency (e.g. 500 Hz) whose amplitude is modulated to create the steady-state  
515 response. Modulation frequencies in the 80–100 Hz range are used to avoid contributions from cortical  
516 generators which are affected by subject state (Korczak, Smart, Delgado, Strobel, & Bradford, 2012). As  
517 with the toneburst ABR, correlations between ASSR and behavioral thresholds reach around 0.9 when a  
518 large range is considered (Luts et al., 2006). More than one frequency and ear can be tested at a time by  
519 “tagging” them with different modulator frequencies. Rather than waveforms, however, the ASSR  
520 assessment is based on a scalar measure of its phase-locking to the modulator (and its harmonics),  
521 expressed as a single summary quantity. In contrast, the pABR provides full response waveforms. This  
522 carries a number of advantages: 1) it allows inference beyond the presence or absence of a response,  
523 such as the investigation of auditory neuropathy and site-of-lesion testing, 2) it allows the separation of  
524 brainstem and cortical responses by their latencies, letting the clinician use middle latency cortical  
525 responses if present, and 3) it will require less training because it draws on clinicians' existing expertise in  
526 interpreting ABR waveforms.

527 Because the pABR tests multiple frequencies at once, the potential for interactions between stimuli in the  
528 cochlea must be considered. Even though highly frequency-specific stimuli can be generated, they may not  
529 elicit place-specific displacements along the basilar membrane when presented without masking (as is  
530 typical). High intensity stimuli elicit broader excitation patterns (Robles & Ruggero, 2001) and excitation  
531 asymmetrically spreads towards the base of the cochlea. Therefore, responses to low-frequency stimuli  
532 include greater contributions from other parts of the cochlea with higher best frequencies. However, the  
533 pABR has the potential to provide better place-specific responses because each of the frequency bands

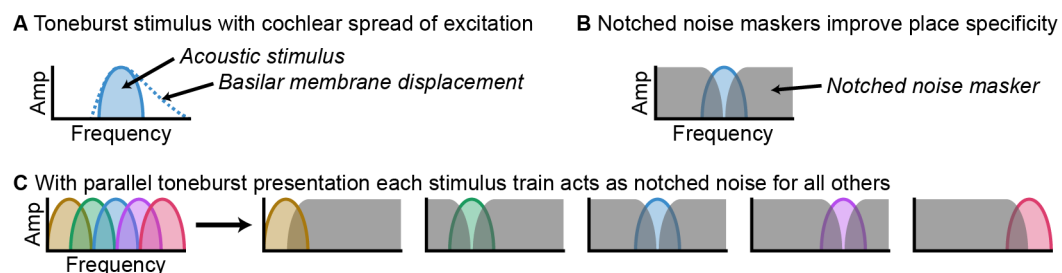

**Figure 11.** Parallel stimulation allows toneburst trains to also function as notched noise. (A) Cartoon representation of a single toneburst stimulus in the frequency domain (filled area), and the pattern of excitation it evokes in the cochlea (dashed line), showing spread of excitation towards the basal end. (B) Notched noise can be used to mask the off-frequency excitation, yielding a more place-specific response. (C) In pABR, each frequency band is masked by the others, which summed have a similar effect to a notched noise masker.

534 could act as masking noise for all the others, as depicted in Figure 8. Essentially, the pABR could act akin  
535 to recording a series of masked ABRs but in one run. Evidence that may support this place-specific  
536 hypothesis comes from the prolonged latencies for the pABR relative the serially recorded responses,  
537 especially for the lower frequencies at higher intensities (Figures 6 and 7). Because spread of excitation is  
538 greater at higher intensities, we would expect to see the biggest differences between pABR and serial ABR  
539 at higher levels. Indeed, we found that at the lower level of 45 dB peSPL, there was no difference between  
540 the two methods in wave V amplitude or latency, indicating minimal interference. However, at the higher  
541 stimulus level of 75 dB peSPL, wave V amplitude was reduced and wave V latency longer for pABR than  
542 serial ABR for the lower frequencies. These differences for lower frequencies are consistent with basal  
543 spread of activation contributing to responses in the traditional ABR but being masked under the pABR.  
544 Thus, at lower stimulus levels, where acquisition generally takes longer and speedups are the most  
545 needed, interactions between bands of the cochlea do not seem to be an issue. At higher levels  
546 interactions appear to be present, likely leading to more modest speedups, but potentially in exchange for  
547 (or because of) improved place specificity.

548 In summary, the pABR is a viable method for recording canonical ABR waveforms at a fraction of the time  
549 of traditional serial methods, particularly for lower intensity stimuli. Consequently, the pABR has great  
550 potential for facilitating quick and accurate hearing threshold estimation that is important for timely  
551 diagnosis and treatment of hearing loss. Furthermore, the advantages of extended analysis windows  
552 afforded by randomized timing allows better noise estimates and inclusion of additional peaks such as the  
553 MLR, which will improve SNR estimates. Finally, our results suggest that the masking provided by  
554 simultaneously presented tonebursts might mitigate spread of activation at higher intensities, with potential  
555 improvements in place specificity. Future studies will focus on investigating optimal parameters for the  
556 pABR to estimate thresholds, modeling place specificity of the pABR, and assessing the utility of the pABR  
557 for estimating thresholds for various configurations of hearing loss with patients in the clinic.

558

## 559 **ACKNOWLEDGEMENTS**

560 The authors wish to thank Sara Fiscella and Madeline Cappelloni for assistance with data collection,  
561 Veronica Valencerina and Kevin Paskiet for assistance with piloting, and Mark Orlando for many helpful  
562 discussions. This work was supported by National Institute for Deafness and Other Communication  
563 Disorders grant R00DC014288 awarded to RKM.



564 **REFERENCES**

- 565 American Academy of Audiology. (2012, August). *Assessment of Hearing in Infants and Young Children*.
- 566 BC Early Hearing Program. (2012). *Audiology Assessment Protocol*. Retrieved from  
567 <http://www.phsa.ca/Documents/bcehpaudiologyassessmentprotocol.pdf>
- 568 Brambrink, A. M., Evers, A. S., Avidan, M. S., Farber, N. B., Smith, D. J., Martin, L. D., ... Olney, J. W.  
569 (2012). Ketamine-induced Neuroapoptosis in the Fetal and Neonatal Rhesus Macaque Brain.  
570 *Anesthesiology: The Journal of the American Society of Anesthesiologists*, 116(2), 372–384.  
571 <https://doi.org/10.1097/ALN.0b013e318242b2cd>
- 572 Burkard, R. F., Don, M., & Eggermont, J. J. (2006). *Auditory Evoked Potentials: Basic Principles and*  
573 *Clinical Application* (1st ed.). Philadelphia: Lippincott Williams & Williams.
- 574 Ching, T. Y. C., Day, J., Van Buynder, P., Hou, S., Zhang, V., Seeto, M., ... Flynn, C. (2014). Language  
575 and speech perception of young children with bimodal fitting or bilateral cochlear implants. *Cochlear*  
576 *Implants International*, 15 Suppl 1, S43-46. <https://doi.org/10.1179/1467010014Z.000000000168>
- 577 Creeley, C., Dikranian, K., Dissen, G., Martin, L., Olney, J., & Brambrink, A. (2013). Propofol-induced  
578 apoptosis of neurones and oligodendrocytes in fetal and neonatal rhesus macaque brain. *BJA:*  
579 *British Journal of Anaesthesia*, 110(suppl\_1), i29–i38. <https://doi.org/10.1093/bja/aet173>
- 580 Cullington, H. E., Bele, D., Brinton, J. C., Cooper, S., Daft, M., Harding, J., ... Wilson, K. (2017). United  
581 Kingdom national paediatric bilateral project: Demographics and results of localization and speech  
582 perception testing. *Cochlear Implants International*, 18(1), 2–22.  
583 <https://doi.org/10.1080/14670100.2016.1265055>
- 584 Elberling, C., & Wahlgreen, O. (1985). Estimation of Auditory Brainstem Response, ABR, by Means of  
585 Bayesian Inference. *Scandinavian Audiology*, 14(2), 89–96.  
586 <https://doi.org/10.3109/01050398509045928>
- 587 Eysholdt, U., & Schreiner, Chr. (1982). Maximum Length Sequences - A Fast Method for Measuring Brain-  
588 Stem-Evoked Responses. *International Journal of Audiology*, 21(3), 242–250.  
589 <https://doi.org/10.3109/00206098209072742>
- 590 FDA. (2017, April 27). Drug Safety and Availability - FDA Drug Safety Communication: FDA approves label  
591 changes for use of general anesthetic and sedation drugs in young children [WebContent].  
592 Retrieved April 22, 2018, from <https://www.fda.gov/Drugs/DrugSafety/ucm554634.htm>
- 593 François, M., Teissier, N., Barthod, G., & Nasra, Y. (2012). Sedation for children 2 to 5 years of age  
594 undergoing auditory brainstem response and auditory steady state responses recordings.  
595 *International Journal of Audiology*, 51(4), 282–286. <https://doi.org/10.3109/14992027.2011.601469>
- 596 Gorga, M. P., Johnson, T. A., Kaminski, J. R., Beauchaine, K. L., Garner, C. A., & Neely, S. T. (2006).  
597 Using a Combination of Click- and Tone Burst-Evoked Auditory Brain Stem Response  
598 Measurements to Estimate Pure-Tone Thresholds. *Ear and Hearing*, 27(1), 60–74.  
599 <https://doi.org/10.1097/01.aud.0000194511.14740.9c>
- 600 Harrison, R. V., Gordon, K. A., & Mount, R. J. (2005). Is there a critical period for cochlear implantation in  
601 congenitally deaf children? Analyses of hearing and speech perception performance after  
602 implantation. *Developmental Psychobiology*, 46(3), 252–261. <https://doi.org/10.1002/dev.20052>
- 603 Hood, L. J. (1998). *Clinical Applications of the Auditory Brainstem Response* (1st ed.). San Diego: Singular  
604 Publishing.



- 605 Hyde, M. (2008). *Ontario Infant Hearing Program Audiologic Assessment Protocol Version 3.1*.
- 606 Jevtovic-Todorovic, V., Hartman, R. E., Izumi, Y., Benshoff, N. D., Dikranian, K., Zorumski, C. F., ...  
607 Wozniak, D. F. (2003). Early Exposure to Common Anesthetic Agents Causes Widespread  
608 Neurodegeneration in the Developing Rat Brain and Persistent Learning Deficits. *Journal of*  
609 *Neuroscience*, 23(3), 876–882. <https://doi.org/10.1523/JNEUROSCI.23-03-00876.2003>
- 610 Joint Committee on Infant Hearing. (2007). Year 2007 position statement: Principles and guidelines for  
611 early hearing detection and intervention. <https://doi.org/10.1044/policy.PS2007-00281>
- 612 Korczak, P., Smart, J., Delgado, R., Strobel, T. M., & Bradford, C. (2012). Auditory Steady-State  
613 Responses. *Journal of the American Academy of Audiology*, 23(3), 146–170.  
614 <https://doi.org/10.3766/jaaa.23.3.3>
- 615 Liberman, M. C., Epstein, M. J., Cleveland, S. S., Wang, H., & Maison, S. F. (2016). Toward a Differential  
616 Diagnosis of Hidden Hearing Loss in Humans. *PLOS ONE*, 11(9), e0162726.  
617 <https://doi.org/10.1371/journal.pone.0162726>
- 618 Luts, H., Desloovere, C., & Wouters, J. (2006). Clinical Application of Dichotic Multiple-Stimulus Auditory  
619 Steady-State Responses in High-Risk Newborns and Young Children. *Audiology and Neurotology*,  
620 11(1), 24–37. <https://doi.org/10.1159/000088852>
- 621 May-Mederake, B. (2012). Early intervention and assessment of speech and language development in  
622 young children with cochlear implants. *International Journal of Pediatric Otorhinolaryngology*, 76(7),  
623 939–946. <https://doi.org/10.1016/j.ijporl.2012.02.051>
- 624 Moeller, M. P. (2000). Early Intervention and Language Development in Children Who Are Deaf and Hard  
625 of Hearing. *Pediatrics*, 106(3), e43–e43. <https://doi.org/10.1542/peds.106.3.e43>
- 626 Özdamar, Ö., & Bohórquez, J. (2006). Signal-to-noise ratio and frequency analysis of continuous loop  
627 averaging deconvolution (CLAD) of overlapping evoked potentials. *The Journal of the Acoustical*  
628 *Society of America*, 119(1), 429–438. <https://doi.org/10.1121/1.2133682>
- 629 Pittman, A. L., & Stelmachowicz, P. G. (2003). Hearing loss in children and adults: Audiometric  
630 configuration, asymmetry, and progression. *Ear and Hearing*, 24(3), 198–205.  
631 <https://doi.org/10.1097/01.AUD.0000069226.22983.80>
- 632 Ramos, N., Almeida, M. G., & Lewis, D. R. (2013). Correlation between frequency-specific auditory  
633 brainstem responses and behavioral hearing assessment in children with hearing loss. *Revista*  
634 *CEFAC*, 15(4), 796–802. <https://doi.org/10.1590/S1516-18462013000400008>
- 635 Robles, L., & Ruggero, M. A. (2001). Mechanics of the Mammalian Cochlea. *Physiological Reviews*, 81(3),  
636 1305–1352.
- 637 Stapells, D. R. (2011). *Frequency-Specific ABR and ASSR Threshold Assessment in Young Infants*.  
638 Retrieved from  
639 [http://www.phonak.com/content/dam/phonak/gc\\_hq/b2b/en/events/2010/Proceedings/Pho\\_Chap\\_0](http://www.phonak.com/content/dam/phonak/gc_hq/b2b/en/events/2010/Proceedings/Pho_Chap_04_Stapells_final.pdf)  
640 [4\\_Stapells\\_final.pdf](http://www.phonak.com/content/dam/phonak/gc_hq/b2b/en/events/2010/Proceedings/Pho_Chap_04_Stapells_final.pdf)
- 641 Stapells, D. R., & Oates, P. (1997). Estimation of the Pure-Tone Audiogram by the Auditory Brainstem  
642 Response: A Review. *Audiology and Neurotology*, 2(5), 257–280.  
643 <https://doi.org/10.1159/000259252>

- 644 Task Force on Newborn and Infant Hearing. (1999). Newborn and Infant Hearing Loss: Detection and  
645 Intervention. *Pediatrics*, 103(2), 527–530. <https://doi.org/10.1542/peds.103.2.527>
- 646 Valderrama, J. T., Alvarez, I., Torre, A. de la, Segura, J. C., Sainz, M., & Vargas, J. L. (2012). Recording of  
647 auditory brainstem response at high stimulation rates using randomized stimulation and averaging.  
648 *The Journal of the Acoustical Society of America*, 132(6), 3856–3865.  
649 <https://doi.org/10.1121/1.4764511>
- 650 Valderrama, J. T., de la Torre, A., Alvarez, I. M., Segura, J. C., Thornton, A. R. D., Sainz, M., & Vargas, J.  
651 L. (2014). Auditory brainstem and middle latency responses recorded at fast rates with randomized  
652 stimulation. *The Journal of the Acoustical Society of America*, 136(6), 3233–3248.  
653 <https://doi.org/10.1121/1.4900832>
- 654 Vohr, B. (2003). Overview: Infants and children with hearing loss—part I. *Mental Retardation and*  
655 *Developmental Disabilities Research Reviews*, 9(2), 62–64. <https://doi.org/10.1002/mrdd.10070>
- 656 Wagner, M., Ryu, Y. K., Smith, S. C., & Mintz, C. D. (2014). Review: Effects of Anesthetics on Brain Circuit  
657 Formation. *Journal of Neurosurgical Anesthesiology*, 26(4), 358–362.  
658 <https://doi.org/10.1097/ANA.0000000000000118>
- 659 Wang, T., Zhan, C., Yan, G., Bohórquez, J., & Özdamar, Ö. (2013). A preliminary investigation of the  
660 deconvolution of auditory evoked potentials using a session jittering paradigm. *Journal of Neural*  
661 *Engineering*, 10(2), 026023. <https://doi.org/10.1088/1741-2560/10/2/026023>
- 662 Wilder, R. T., Flick, R. P., Sprung, J., Katusic, S. K., Barbaresi, W. J., Mickelson, C., ... Warner, D. O.  
663 (2009). Early Exposure to Anesthesia and Learning Disabilities in a Population-Based Birth Cohort.  
664 *Anesthesiology*, 110(4), 796–804. <https://doi.org/10.1097/01.anes.0000344728.34332.5d>
- 665 Yoshinaga-Itano, C., Sedey, A. L., Coulter, D. K., & Mehl, A. L. (1998). Language of early- and later-  
666 identified children with hearing loss. *Pediatrics*, 102(5), 1161–1171.
- 667

668 **TABLES**

669

|                            |          | S2          | S3          | S5          | S6          | S7          | S8          | S9          | S10         | S11         | LQ                 | MED                | UQ                 |             |
|----------------------------|----------|-------------|-------------|-------------|-------------|-------------|-------------|-------------|-------------|-------------|--------------------|--------------------|--------------------|-------------|
| 75 dB peSPL                | Parallel | 500 Hz      | 0.41        | 4.91        | 1.93        | 3.00        | 22.56       | 0.99        | 0.93        | 0.50        | 3.63               | 0.93               | 1.93               | 3.63        |
|                            |          | 1000 Hz     | 0.35        | 0.68        | 0.97        | 0.60        | 2.39        | 0.36        | 0.24        | 0.21        | 1.40               | 0.35               | 0.60               | 0.97        |
|                            |          | 2000 Hz     | 0.36        | 0.54        | 0.70        | 0.91        | 1.89        | 0.19        | 0.29        | 0.40        | 0.51               | 0.36               | 0.51               | 0.70        |
|                            |          | 4000 Hz     | 0.17        | 0.64        | 0.26        | 0.32        | 1.82        | 0.16        | 0.27        | 0.30        | 0.31               | 0.26               | 0.30               | 0.32        |
|                            |          | 8000 Hz     | 0.20        | 0.66        | 0.44        | 0.64        | 2.88        | 0.27        | 0.28        | 0.25        | 0.66               | 0.27               | 0.44               | 0.66        |
|                            |          | Total (MAX) | 0.41        | 4.91        | 1.93        | 3.00        | 22.56       | 0.99        | 0.93        | 0.50        | 3.63               | <b>0.93</b>        | <b>1.93</b>        | <b>3.63</b> |
|                            | Serial   | 500 Hz      | 0.18        | 0.73        | 0.61        | 0.27        | 14.24       | 0.35        | 0.15        | 0.09        | 0.79               | 0.18               | 0.35               | 0.73        |
|                            |          | 1000 Hz     | 0.06        | 0.19        | 0.27        | 0.06        | 0.77        | 0.12        | 0.05        | 0.07        | 0.22               | 0.06               | 0.12               | 0.22        |
|                            |          | 2000 Hz     | 0.07        | 0.19        | 0.16        | 0.13        | 0.79        | 0.08        | 0.07        | 0.05        | 0.14               | 0.07               | 0.13               | 0.16        |
|                            |          | 4000 Hz     | 0.05        | 0.32        | 0.15        | 0.10        | 0.74        | 0.08        | 0.06        | 0.08        | 0.21               | 0.08               | 0.10               | 0.21        |
|                            |          | 8000 Hz     | 0.11        | 0.41        | 0.43        | 0.16        | 0.66        | 0.09        | 0.08        | 0.11        | 0.36               | 0.11               | 0.16               | 0.41        |
| Total (2×SUM)              |          | 0.94        | 3.68        | 3.23        | 1.45        | 34.40       | 1.44        | 0.82        | 0.82        | 3.45        | <b>0.94</b>        | <b>1.45</b>        | <b>3.45</b>        |             |
| 45 dB peSPL                | Parallel | 500 Hz      | 0.57        | 8.99        | 1.44        | 7.76        | 8.78        | 1.86        | 0.83        | 4.60        | 53.12              | 1.44               | 4.60               | 8.78        |
|                            |          | 1000 Hz     | 0.47        | 1.76        | 3.04        | 1.31        | 7.79        | 0.86        | 0.58        | 0.82        | 1.73               | 0.82               | 1.31               | 1.76        |
|                            |          | 2000 Hz     | 0.23        | 0.62        | 1.10        | 1.03        | 3.69        | 0.31        | 0.29        | 0.50        | 1.01               | 0.31               | 0.62               | 1.03        |
|                            |          | 4000 Hz     | 0.41        | 0.93        | 0.47        | 0.71        | 9.26        | 0.25        | 0.32        | 0.50        | 0.69               | 0.41               | 0.50               | 0.71        |
|                            |          | 8000 Hz     | 0.57        | 1.54        | 0.65        | 0.84        | 10.34       | 0.30        | 0.30        | 0.45        | 1.10               | 0.45               | 0.65               | 1.10        |
|                            |          | Total (MAX) | 0.57        | 8.99        | 3.04        | 7.76        | 10.34       | 1.86        | 0.83        | 4.60        | 53.12              | <b>1.86</b>        | <b>4.60</b>        | <b>8.99</b> |
|                            | Serial   | 500 Hz      | 0.15        | 1.71        | 1.99        | 1.56        | 11.64       | 2.11        | 0.84        | 0.89        | 20.17              | 0.89               | 1.71               | 2.11        |
|                            |          | 1000 Hz     | 0.13        | 0.60        | 0.37        | 0.83        | 6.00        | 0.98        | 0.48        | 0.91        | 7.12               | 0.48               | 0.83               | 0.98        |
|                            |          | 2000 Hz     | 0.15        | 0.51        | 1.00        | 0.67        | 5.52        | 0.18        | 0.32        | 0.42        | 0.77               | 0.32               | 0.51               | 0.77        |
|                            |          | 4000 Hz     | 0.22        | 0.85        | 0.53        | 0.37        | 4.50        | 0.16        | 0.21        | 0.45        | 0.53               | 0.22               | 0.45               | 0.53        |
|                            |          | 8000 Hz     | 0.21        | 1.29        | 0.66        | 0.47        | 2.81        | 0.20        | 0.23        | 0.31        | 1.21               | 0.23               | 0.47               | 1.21        |
| Total (2×SUM)              |          | 1.72        | 9.92        | 9.10        | 7.81        | 60.94       | 7.27        | 4.16        | 5.95        | 59.60       | <b>5.95</b>        | <b>7.81</b>        | <b>9.92</b>        |             |
|                            |          | S2          | S3          | S0          | S6          | S7          | S8          | S9          | S10         | S11         | LQ                 | MED                | UQ                 |             |
| <i>Speedup 75 dB peSPL</i> |          | <i>2.30</i> | <i>0.75</i> | <i>1.68</i> | <i>0.48</i> | <i>1.52</i> | <i>1.45</i> | <i>0.89</i> | <i>1.64</i> | <i>0.95</i> | <b><i>0.89</i></b> | <b><i>1.45</i></b> | <b><i>1.64</i></b> |             |
| <i>Speedup 45 dB peSPL</i> |          | <i>3.00</i> | <i>1.10</i> | <i>2.99</i> | <i>1.01</i> | <i>5.90</i> | <i>3.92</i> | <i>5.03</i> | <i>1.29</i> | <i>1.12</i> | <b><i>1.12</i></b> | <b><i>2.99</i></b> | <b><i>3.92</i></b> |             |

670

671 **Table 1.** Time to 0 dB SNR (in minutes) for each subject as well as the median and quantiles. For each  
672 method at each stimulus level the time is shown for all frequencies, with the total (computed with the  
673 appropriate method) shown below. Shown at the bottom in italics are the speedups for both stimulus levels.  
674 These numbers are unitless ratios, rather than minutes, where higher numbers represent an advantage for  
675 the pABR over the serial ABR.

676

677 **FIGURE CAPTIONS**

678 **Figure 1.** pABR stimulus construction. **(A)** Individual toneburst stimuli for each frequency. **(B)** Toneburst  
679 trains in each ear (colored lines) are summed to create a two-channel (left, right) stimulus epoch (black  
680 lines).

681

682 **Figure 2.** The distribution of inter-stimulus intervals over all stimuli for  $\lambda = 40$  stimuli / s (solid gray)  
683 compared to the predicted distribution given by  $P(t) = 40e^{-40t}$ . There is a very close match indicating that  
684 the deviations from a true Poisson point process used in this experiment are negligible.

685

686 **Figure 3.** The analysis chain, shown from stimulus creation and presentation to calculation of response  
687 waveforms. For clarity, only a 50 ms time period is shown. Dashed box: Zero-padding scheme shown for a  
688 single impulse train of a single epoch. Note  $t_{pre}$  and  $t_{post}$  are not shown to scale.

689

690 **Figure 4.** Intensity series waveforms across frequencies and for the left and right ears. **(A)** Grand average  
691 of 8 subjects. **(B,C)** Two example subjects' responses. All responses are plotted over the interval 0 to 25  
692 ms.

693

694 **Figure 5.** Mean wave V latency **(A)** and amplitude **(B)** as a function of intensity. Stimulus frequency is  
695 indicated on each line. Error bars (where large enough to be seen) indicate  $\pm 1$  SEM. Lines have a slight  
696 horizontal offset in **B** to reduce overlap.

697

698 **Figure 6.** Parallel vs series acquisition waveforms (right ear only). **(A)** Grand average. **(B,C)** Example  
699 subjects. pABR is shown in colored lines. Corresponding serial waveforms are shown in black. Vertical  
700 spacing is 0.3  $\mu\text{V}$  / div.

701

702 **Figure 7.** Comparison of pABR with serial wave V latency **(A)** and amplitude **(B)** for all subjects ( $N = 9$ ) at  
703 each frequency for both stimulus levels. Quantities shown are for the right ear. Stimulus frequency  
704 indicated by marker number and color.

705

706 **Figure 8.** Comparison of time to reach 20 nV residual noise for all 10 waveforms between methods (pABR  
707 in black, serial in gray). Two intensities for 9 subjects are shown, leading to 18 data points for each  
708 acquisition method.

709

710 **Figure 9.** pABR shows faster acquisition and better SNR. **(A)** Real-time acquisition runs simulated from  
711 offline data for one subject at 45 dB peSPL. For serial ABR, unrecorded left ear runs were assumed to be  
712 equal to right ear. **(B)** Comparison recording time for 9 subjects. Points below dotted unity line are cases  
713 where pABR is faster. Shaded regions indicate speedup ratios of 1–2 (light gray), 2–4 (medium gray), and  
714  $> 4$  (dark gray). **(C)** SNR of pABR runs upon serial acquisition completion (subjects colored points, median  
715 black lines), corresponding for one subject to the points on the red dashed vertical line in **A**.

716

717 **Figure 10.** Improved visual response detection. **(A)** 500 Hz response waveform alone. **(B)** Same response  
718 with other frequencies simultaneously acquired. Dotted gray box surrounds the waveform from **A**. **(C)** 500  
719 Hz response with other frequencies present and analysis window extended 10 ms to the left and 20 ms to  
720 the right. Gray box as in **B**.

721

722 **Figure 11.** Parallel stimulation allows toneburst trains to also function as notched noise. **(A)** Cartoon  
723 representation of a single toneburst stimulus in the frequency domain (filled area), and the pattern of  
724 excitation it evokes in the cochlea (dashed line), showing spread of excitation towards the basal end. **(B)**  
725 Notched noise can be used to mask the off-frequency excitation, yielding a more place-specific response.  
726 **(C)** In pABR, each frequency band is masked by the others, which summed have a similar effect to a  
727 notched noise masker.
